# Supplementary material for: WMGHMDA: a novel weighted meta-graph-based model for predicting human microbe-disease association on heterogeneous information network
Source: PubMed Central journal article supplement (PMC6824056; doi:10.1186/s12859-019-3066-0), 2019-11-01

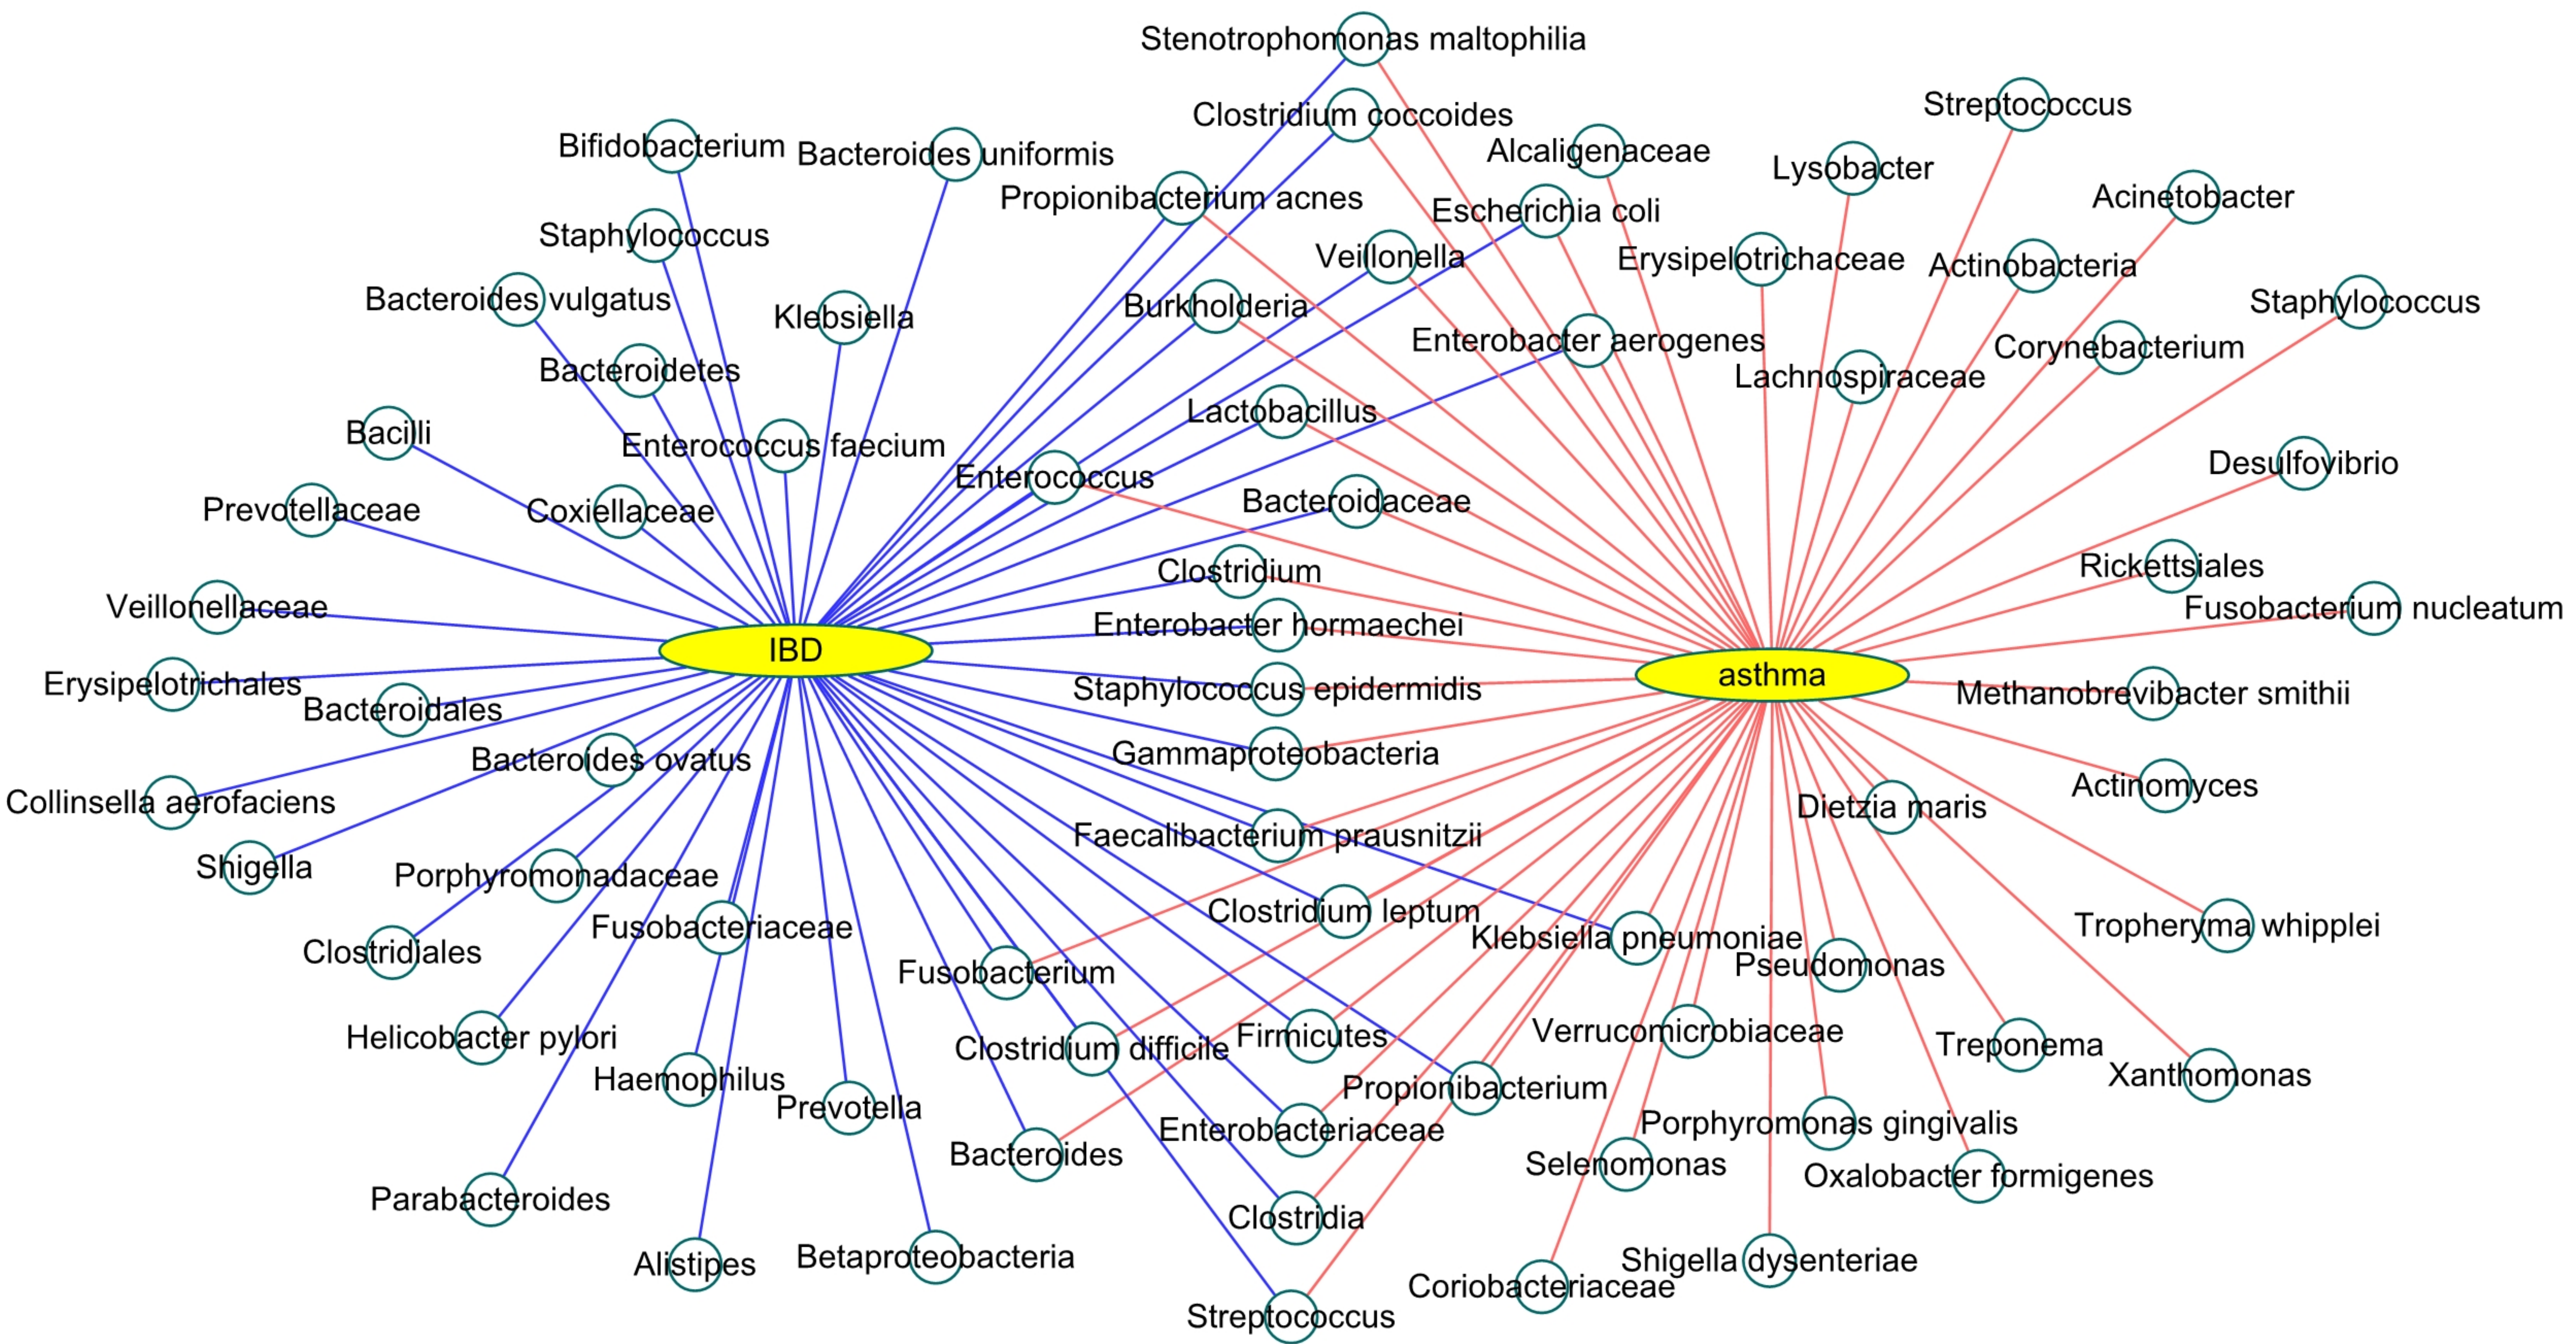

Supplement: 12859_2019_3066_MOESM2_ESM.pdf [file 12859_2019_3066_MOESM2_ESM.pdf]
